# Supplementary material for: On the safety of nanoformulations to non-target soil invertebrates – an atrazine case study
Source: Royal Society of Chemistry journal article supplement (doi:10.1039/c9en00242a), 2019-01-01
Supplement: c9en00242a1.pdf [file c9en00242a1.pdf]

## Electronic Supplementary Information

### On the safety of nanoformulations to non-target soil invertebrates – atrazine case study

Susana I.L. Gomes,<sup>\*,a</sup> Janeck J. Scott-Fordsmand,<sup>b</sup> Estefânia V.R. Campos,<sup>c,d</sup> Renato  
Grillo,<sup>e</sup> Leonardo F. Fraceto,<sup>c</sup> and Mónica J.B. Amorim<sup>\*,a</sup>

<sup>a</sup>Department of Biology & CESAM, University of Aveiro, 3810-193 Aveiro, Portugal

<sup>b</sup>Department of Bioscience, Aarhus University, Vejlsovej 25, PO BOX 314, DK-8600  
Silkeborg, Denmark

<sup>c</sup>São Paulo State University (UNESP), Institute of Science and Technology, Sorocaba, SP,  
Brazil

<sup>d</sup>Human and Natural Sciences Center, Federal University of ABC, Santo André, SP,  
Brazil

<sup>e</sup>São Paulo State University (UNESP), Department of Physics and Chemistry, School of  
Engineering, Ilha Solteira, SP, Brazil

**Table S1** Hydrodynamic diameter (Z average), using dynamic light scattering (DLS) of the polymeric nanocapsules (NCs) and nanocapsules containing atrazine (nano\_ATZ): mean diameter is the average of 3 measurements ( $\pm$  standard deviation); polydispersity index (PDI).

| material | equivalent soil concentration (mg ATZ/kg soil) | Diameter (nm) | PDI   |
|----------|------------------------------------------------|---------------|-------|
| NCs      | 1                                              | 221 $\pm$ 2   | 0.226 |
|          | 5                                              | 219 $\pm$ 3   | 0.134 |
|          | 10                                             | 224 $\pm$ 2   | 0.153 |
|          | 50                                             | 219 $\pm$ 4   | 0.120 |
|          | 100                                            | 223 $\pm$ 2   | 0.139 |
|          | 200                                            | 219 $\pm$ 3   | 0.132 |
| nano_ATZ | 1                                              | 238 $\pm$ 3   | 0.237 |
|          | 5                                              | 230 $\pm$ 1   | 0.155 |
|          | 10                                             | 240 $\pm$ 1   | 0.162 |
|          | 50                                             | 237 $\pm$ 1   | 0.173 |
|          | 100                                            | 236 $\pm$ 1   | 0.171 |
|          | 200                                            | 232 $\pm$ 3   | 0.172 |

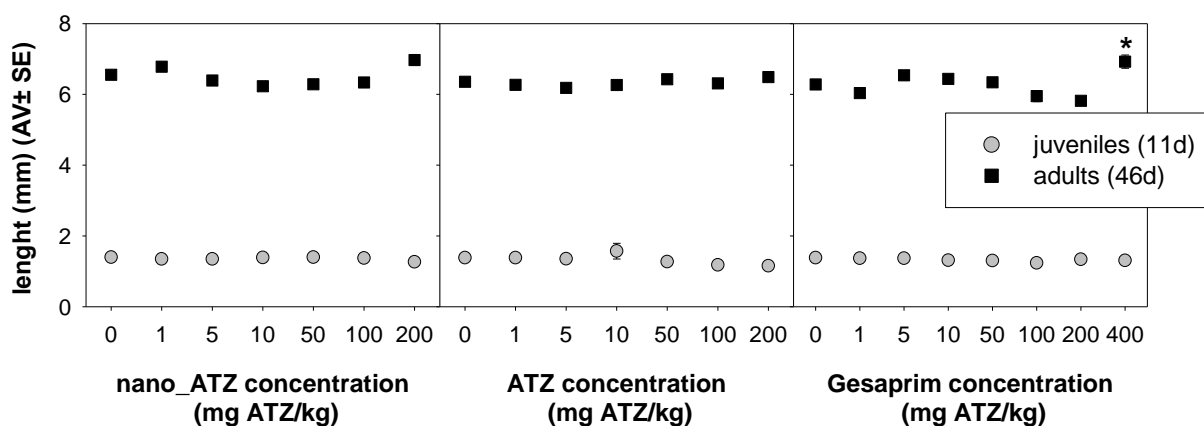

**Fig. S1** Results of *Enchytraeus crypticus*' length after exposure to nanocapsules containing atrazine (nano\_ATZ), pure atrazine (ATZ), and gesaprim, in LUFA 2.2 soil,

for 11 and 46 days. Results are presented as average  $\pm$  standard error.). \*  $p < 0.05$  (Dunn's method).

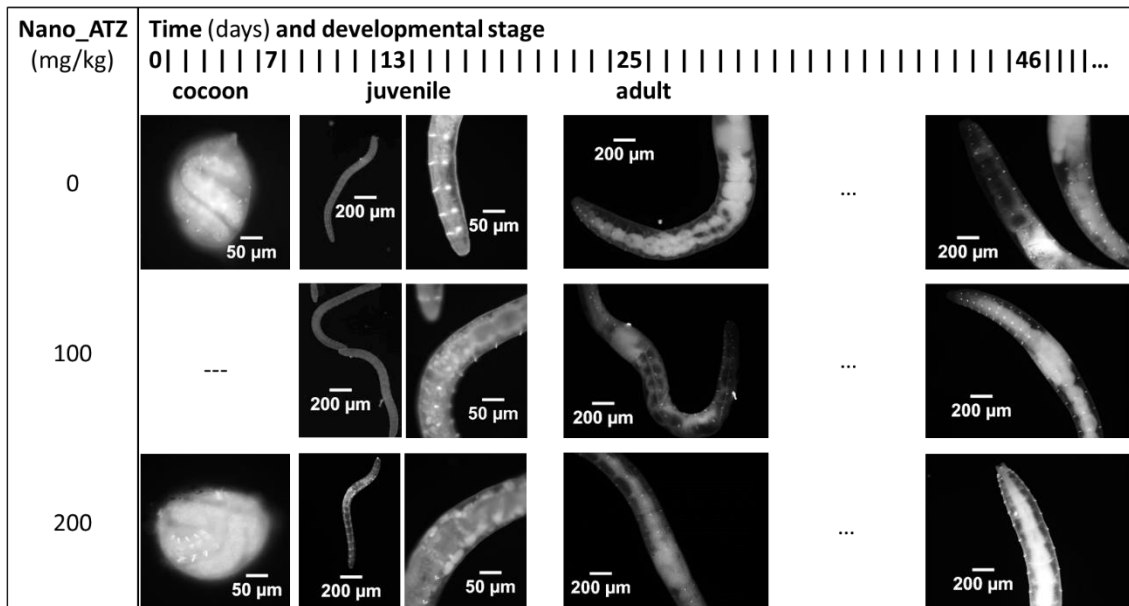

**Fig. S2** Selected pictures from fluorescence microscope analysis of *Enchytraeus crypticus*, collected over time: cocoons (7 days), juveniles (13 days), and adults (25 and 46 days), when exposed to 0, 100 and 200 mg ATZ/kg of labelled nanocapsules containing atrazine (labelled\_nano\_ATZ) in LUFA 2.2 soil.
